# Supplementary material
Source: HighWire-hosted journal article supplement (https://bmjopen.bmj.com/content/11/12/e052902)
Supplement: inline-supplementary-material-2 [file inline-supplementary-material-2.pdf]

Supplementary Table 2 – Example of the survey questions provided to the radiologists at the end of the study.

|                                                                                             | Significantly worse         | Moderately worse         | Slightly worse         | About the same | Slightly better        | Moderately better        | Significantly better        |
|---------------------------------------------------------------------------------------------|-----------------------------|--------------------------|------------------------|----------------|------------------------|--------------------------|-----------------------------|
| How do you feel this tool impacted <b>reporting time</b> ?                                  | 0                           | 0                        | 0                      | 0              | 0                      | 0                        | 0                           |
| How do you feel this tool impacted <b>reporting accuracy</b> ?                              | 0                           | 0                        | 0                      | 0              | 0                      | 0                        | 0                           |
|                                                                                             | Very dissatisfied           | Dissatisfied             | Somewhat dissatisfied  | Neutral        | Somewhat satisfied     | Satisfied                | Very satisfied              |
| How satisfied were you with <b>reporting time</b> using this CXR tool?                      | 0                           | 0                        | 0                      | 0              | 0                      | 0                        | 0                           |
| How satisfied were you with the <b>accuracy</b> of this CXR tool's results?                 | 0                           | 0                        | 0                      | 0              | 0                      | 0                        | 0                           |
|                                                                                             | Significantly more negative | Moderately more negative | Slightly more negative | About the same | Slightly more positive | Moderately more positive | Significantly more positive |
| Did your <b>attitude towards the CXR tool itself</b> change from start to end of the trial? | 0                           | 0                        | 0                      | 0              | 0                      | 0                        | 0                           |
| Has your <b>attitude towards AI in general</b> changed after using this CXR tool?           | 0                           | 0                        | 0                      | 0              | 0                      | 0                        | 0                           |
|                                                                                             | Strongly disagree           | Somewhat disagree        | Neutral                | Somewhat agree | Strongly agree         |                          |                             |
| I think that I would like to use this system frequently.                                    | 0                           | 0                        | 0                      | 0              | 0                      |                          |                             |
| I found the system unnecessarily complex.                                                   | 0                           | 0                        | 0                      | 0              | 0                      |                          |                             |
| I thought the system was easy to use.                                                       | 0                           | 0                        | 0                      | 0              | 0                      |                          |                             |
| I think that I would need the support of a technical person to be able to use this system.  | 0                           | 0                        | 0                      | 0              | 0                      |                          |                             |
| I found the various functions in this system were well integrated.                          | 0                           | 0                        | 0                      | 0              | 0                      |                          |                             |
| I thought there was too much inconsistency in this system.                                  | 0                           | 0                        | 0                      | 0              | 0                      |                          |                             |
| I would imagine that most people would learn to use this system very quickly.               | 0                           | 0                        | 0                      | 0              | 0                      |                          |                             |
| I found the system very cumbersome to use.                                                  | 0                           | 0                        | 0                      | 0              | 0                      |                          |                             |
| I felt very confident using the system.                                                     | 0                           | 0                        | 0                      | 0              | 0                      |                          |                             |
| I needed to learn a lot of things before I could get going with this system.                | 0                           | 0                        | 0                      | 0              | 0                      |                          |                             |

I would be disappointed if I could no longer use the CXR AI tool in my practice.
